# Supplementary material for: Setting Up a Conservation Studio contributions
Source: Royal Society of Chemistry journal article supplement (doi:10.1039/d2dt01592g), 1981-05-01
Supplement: d2dt01592g1.pdf [file d2dt01592g1.pdf]

## **Fluorene-decorated Ir(III) complexes: Synthesis, photophysics and tunable triplet excited state properties in aggregation**

Senqiang Zhu,<sup>\*a</sup> Qianqian Pan,<sup>a</sup> Yuhao Li,<sup>\*b</sup> Wenqing Liu,<sup>c</sup> Rui Liu,<sup>\*a</sup> Hongjun Zhu.<sup>a</sup>

<sup>a</sup> *School of Chemistry and Molecular Engineering, Nanjing Tech University, Nanjing 211816, China.*

<sup>b</sup> *Institute of Bismuth and Rhenium, School of Materials and Chemistry, University of Shanghai for Science and Technology, Shanghai 200093, China.*

<sup>c</sup> *Shanghai Institute of Technical Physics, Chinese Academy of Sciences, Shanghai, 200083, China.*

*\* E-mail: zhusenqiang1993@njtech.edu.cn, yhli@usst.edu.cn, rui.liu@njtech.edu.cn,*

## 1. Experimental Section

**Synthesis of 4,4'-F8-BPy.** 4,4'-Dibromo-2,2'-bipyridine (1.13 mmol, 355 mg, 1.00 equiv.), **F8-B** (2.32 mmol, 11985 mg, 2.05 equiv.), Pd(PPh<sub>3</sub>)<sub>4</sub> (0.136 mmol, 157 mg, 0.120 equiv.), PPh<sub>3</sub> (0.136 mmol, 36.0 mg, 0.120 equiv.) and toluene (50 mL)/ethanol (6 mL) were added into a three-neck flask in turn, then the K<sub>2</sub>CO<sub>3</sub> (11.3 mmol, 1562 mg, 10.0 equiv.)/H<sub>2</sub>O (6 mL) solution was added. The reaction mixture was stirred smoothly and heated to reflux for 48 h under an argon atmosphere. The thin layer chromatography method (hexane/ethyl acetate = 3/1, v/v) was used to monitor the degree of reaction. The rotary evaporation instrument was operated to remove the solvent after the reaction mixture was cooled to room temperature (R.T.) naturally. Then CH<sub>2</sub>Cl<sub>2</sub> was used to extract the residue, afterwards, the combined organic solution was washed with distilled water and dried using anhydrous MgSO<sub>4</sub>. The crude product was purified through column chromatography (silica gel, 100-200 mesh) using hexane/ethyl acetate (10/1, v/v) as the eluent to afford colorless oil in a yield of 67% (706 mg). <sup>1</sup>H NMR (400 MHz, Chloroform-*d*) δ 8.89–8.79 (m, 4H), 7.90–7.76 (m, 8H), 7.72–7.66 (m, 2H), 7.46–7.33 (m, 6H), 2.16–2.00 (m, 8H), 1.24–1.01 (m, 40H), 0.83 (t, *J* = 7.0 Hz, 12H), 0.69 (t, *J* = 9.0 Hz, 8H).

**Synthesis of [(HF8-Py)<sub>2</sub>-IrCl]<sub>2</sub>.** HF8-Py (0.880 mmol, 411 mg, 2.00 equiv.), IrCl<sub>3</sub>·3H<sub>2</sub>O (0.440 mmol, 155 mg, 1.00 equiv.) and CH<sub>3</sub>OCH<sub>2</sub>CH<sub>2</sub>OH (20 mL) /H<sub>2</sub>O (6 mL) were added into a two-neck flask, then the reaction mixture was stirred smoothly and heated to reflux for 16 h under argon atmosphere. The thin layer chromatography method (hexane/ethyl acetate = 6/1, v/v) was employed to monitor the progress of the reaction. The solvent was removed by rotary evaporation instrument after the reaction mixture was cooled to R.T. naturally. Then CH<sub>2</sub>Cl<sub>2</sub> was utilized to extract the residue, afterwards, the CH<sub>2</sub>Cl<sub>2</sub> layer was washed with distilled water and dried using anhydrous MgSO<sub>4</sub>. The crude product was purified by column chromatography (silica gel, 100-200 mesh) using hexane/ethyl acetate (10/1, v/v) as the eluent to obtain orange-red oil in a yield of 70% (358 mg). The complex was used directly in the next procedure without any further purification and characterization.

**Synthesis of [(HF8-BTZ)<sub>2</sub>-IrCl]<sub>2</sub>.** HF8-BTZ (1.20 mmol, 628 mg, 2.00 equiv.), IrCl<sub>3</sub>·3H<sub>2</sub>O (0.600 mmol, 212 mg, 1 equiv.) and CH<sub>3</sub>OCH<sub>2</sub>CH<sub>2</sub>OH (20 mL)/H<sub>2</sub>O (6 mL) were added into a two-neck round flask, then the reaction mixture was stirred smoothly and heated to reflux for 16 h under argon atmosphere. The thin layer chromatography method (hexane/ethyl acetate = 6/1, v/v) was employed to monitor the extent of the reaction. The solvent was removed by rotary evaporation instrument after the reaction mixture was cooled to r.t. naturally. Then CH<sub>2</sub>Cl<sub>2</sub> was utilized to extract the residue, afterwards, the CH<sub>2</sub>Cl<sub>2</sub> layer was washed with distilled water and dried over anhydrous MgSO<sub>4</sub>. The crude product was purified by column chromatography (silica gel, 100-200 mesh) using hexane/ethyl acetate (10/1, v/v) as the eluent to get red oil in a yield of 72% (550 mg). The complex was used directly in the next procedure without any further purification and characterization.

## 2. <sup>1</sup>H NMR and <sup>13</sup>C NMR of Ir1 and Ir2

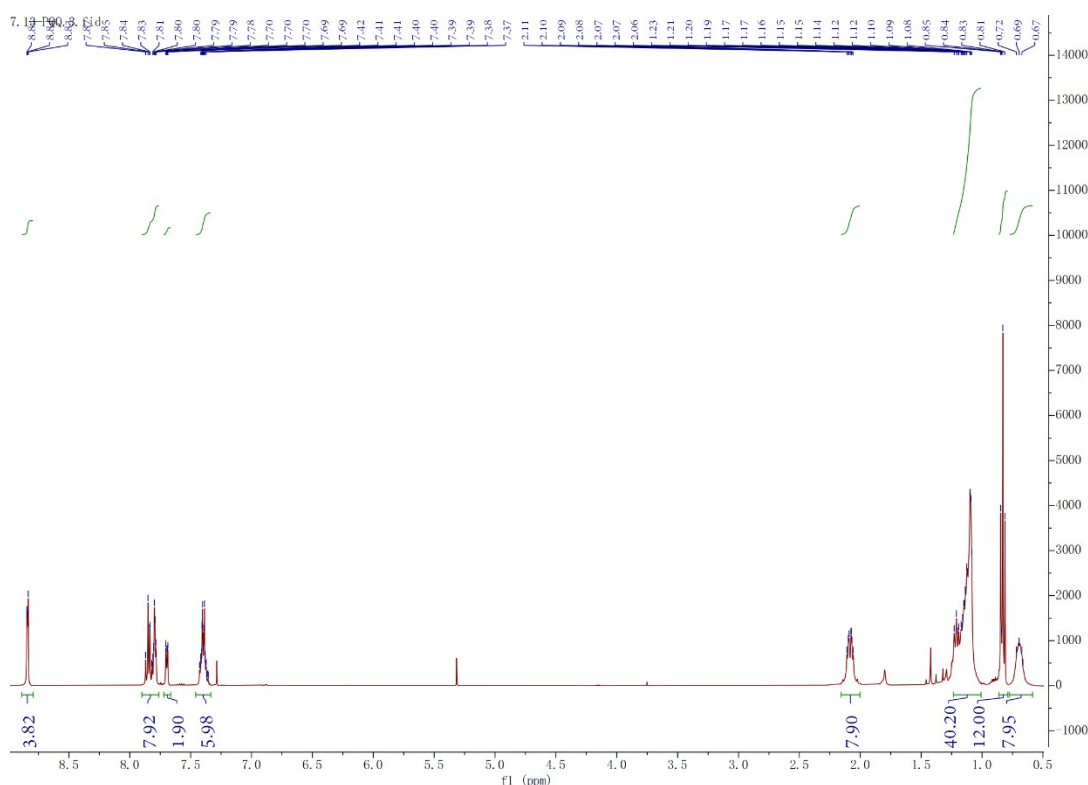

Figure S1. <sup>1</sup>H NMR spectrum of 4,4'-F8-BPy.



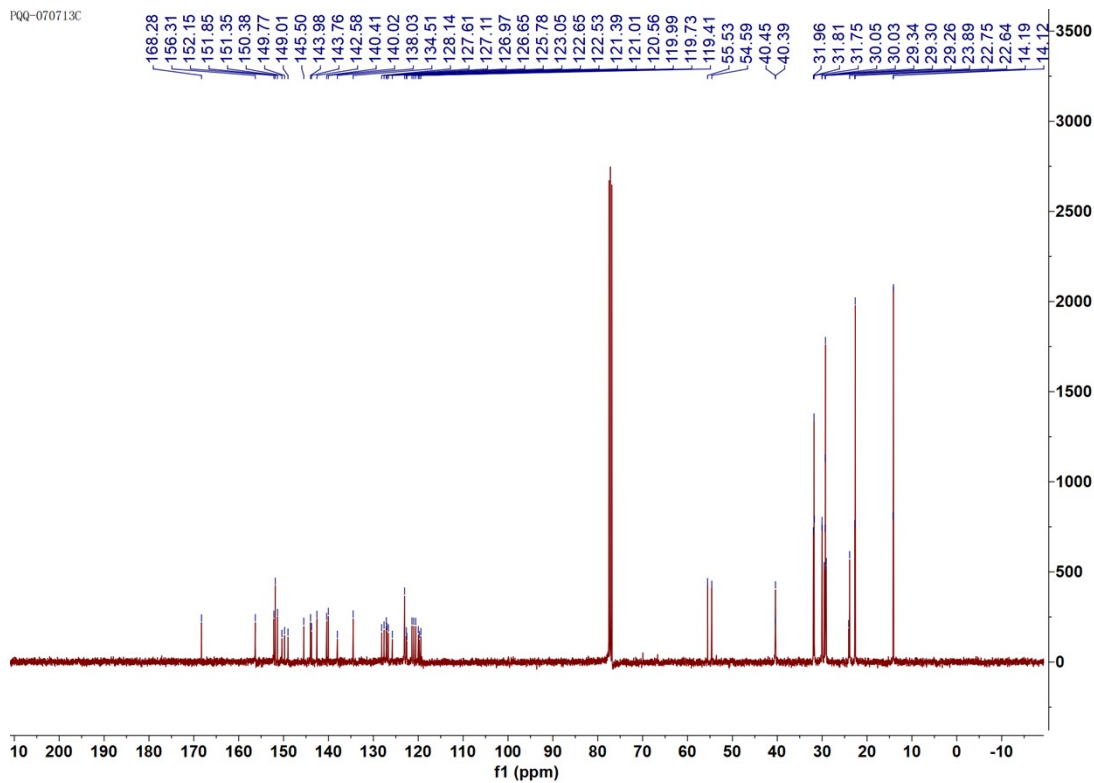

Figure S4.  $^{13}\text{C}$  NMR spectrum of Ir1.

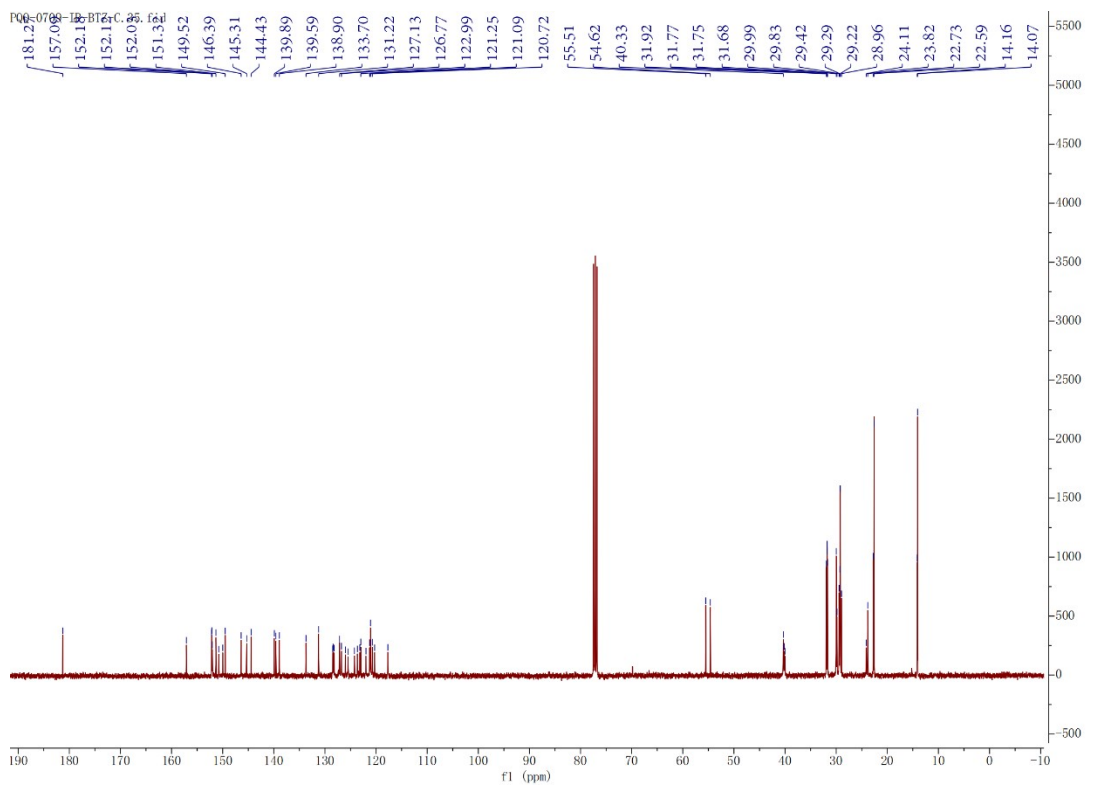

Figure S5.  $^{13}\text{C}$  NMR spectrum of Ir2.

### 3. Photophysical properties of Ir1–Ir2

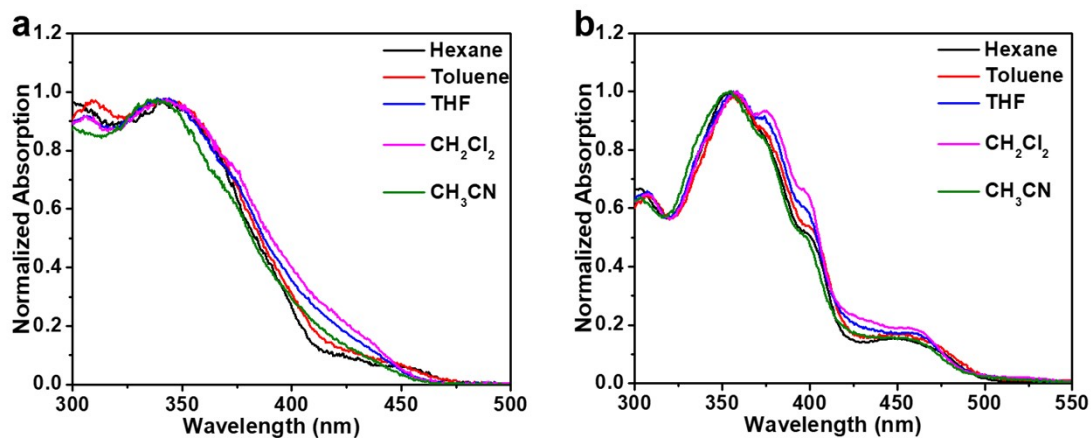

Figure S6. Normalized absorption spectra of (a) **Ir1** and (b) **Ir2** in different solvents.

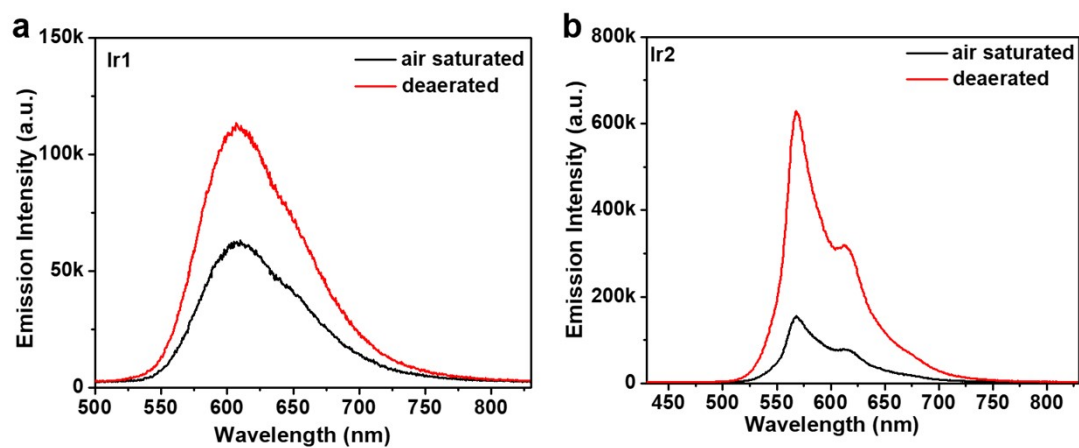

Figure S7. Emission spectra of complexes (a) **Ir1**, (b) **Ir2** in CH<sub>2</sub>Cl<sub>2</sub> solution under nitrogen and air atmosphere ( $c = 1 \times 10^{-5} \text{ mol}\cdot\text{L}^{-1}$ ,  $\lambda_{\text{ex}} = 420 \text{ nm}$ ).

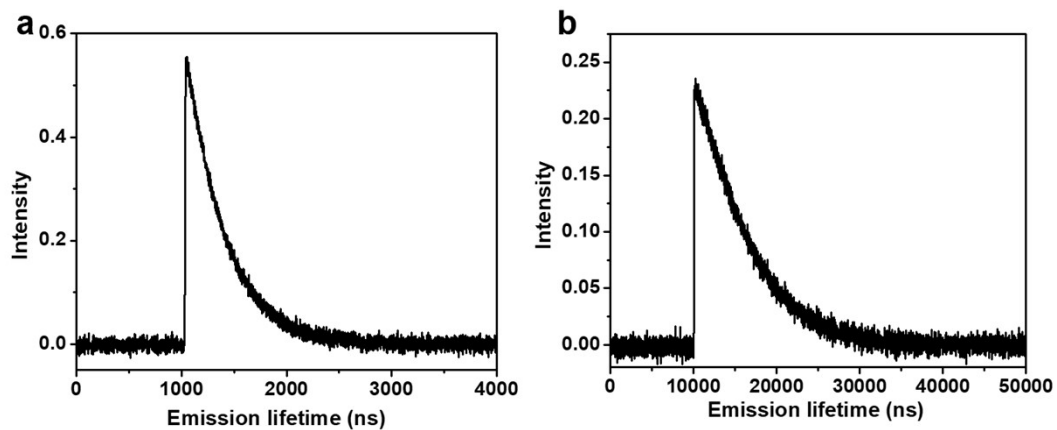

Figure S8. Emission lifetime spectra of (a) complexes **Ir1** ( $\lambda_{\text{em}} = 608 \text{ nm}$ ) and (b) **Ir2** ( $\lambda_{\text{em}} = 568 \text{ nm}$ ) in deaerated  $\text{CH}_2\text{Cl}_2$  ( $c = 1 \times 10^{-5} \text{ mol}\cdot\text{L}^{-1}$ ).

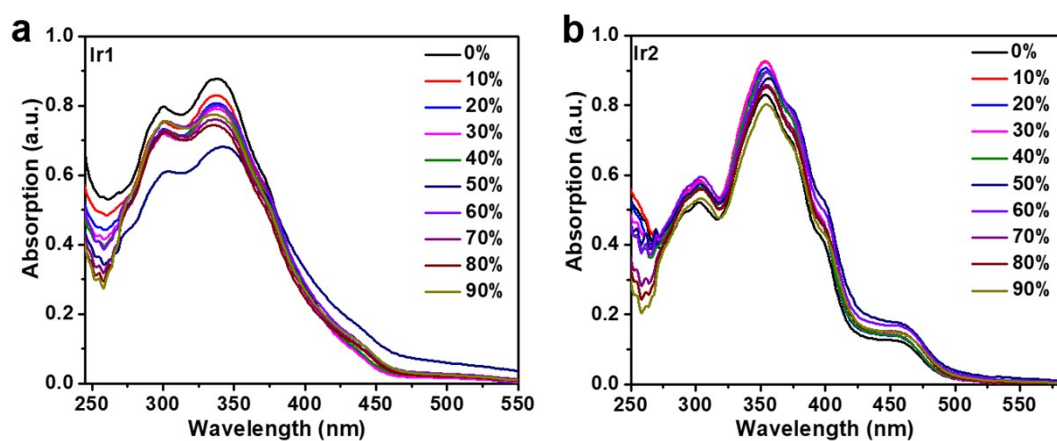

Figure S9. UV-vis absorption of Ir(III) complexes (a) **Ir1** and (b) **Ir2** in  $\text{CH}_3\text{CN}$  with different water contents (vol, 0–90%), respectively.

#### 4. TDDFT calculations of Ir1 and Ir2

Table S1. Single point energy calculation results for each structure of **Ir1** and **Ir2**

|    | E/hartree           |    | E/hartree           |
|----|---------------------|----|---------------------|
| 1a | -21119.314349353237 | 2a | -22070.481634133950 |
| 1b | -21119.313512732577 | 2b | -22070.481564555230 |
| 1c | -21119.297822335691 | 2c | -22070.463670568533 |
| 1d | -21119.313538726765 | 2d | -22070.481741264324 |

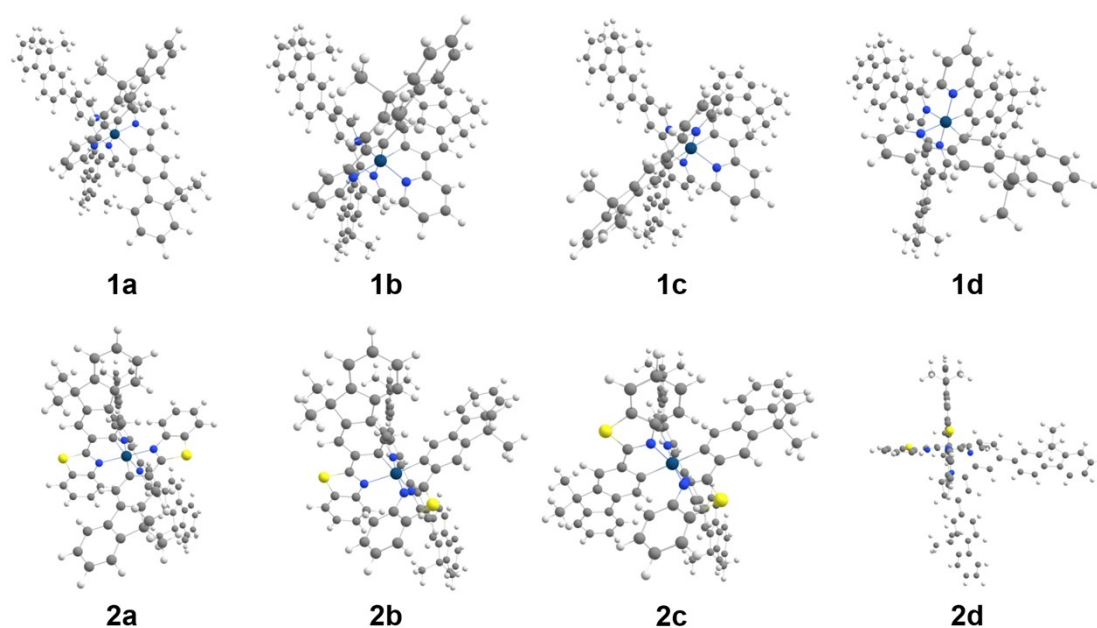

Figure S10. Optimized geometries for complexes **Ir1–Ir2** in  $\text{CH}_2\text{Cl}_2$  using with B3LYP functional and mixed basis set (SARC-DKH-TZVP basis set for Ir atom and DKH-def2-TZVP (-f) basis set for other atoms)



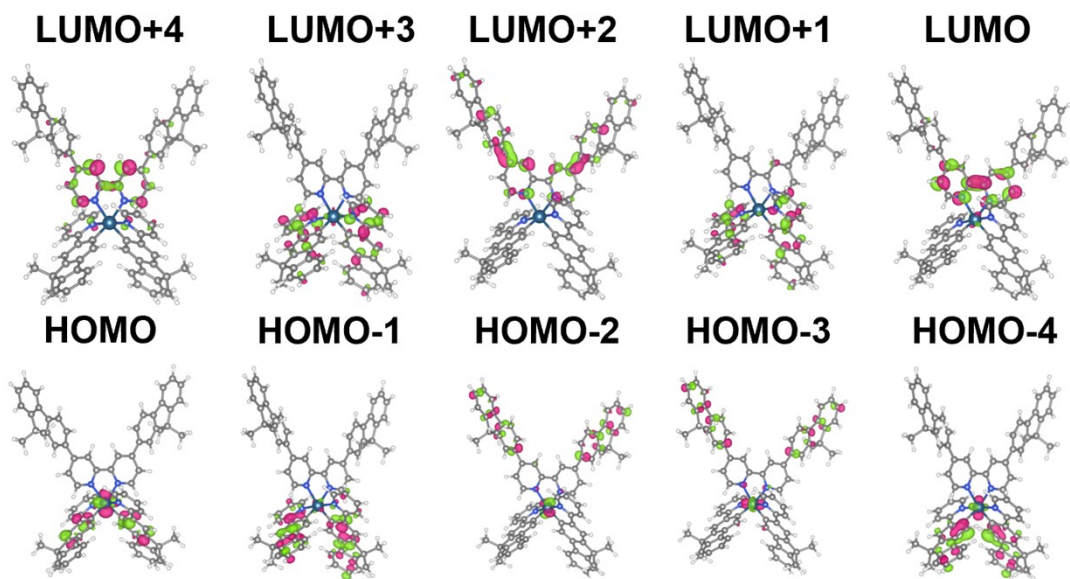

Figure S11. Contour plots of the five HOMOs and five LUMOs for **Ir1**.

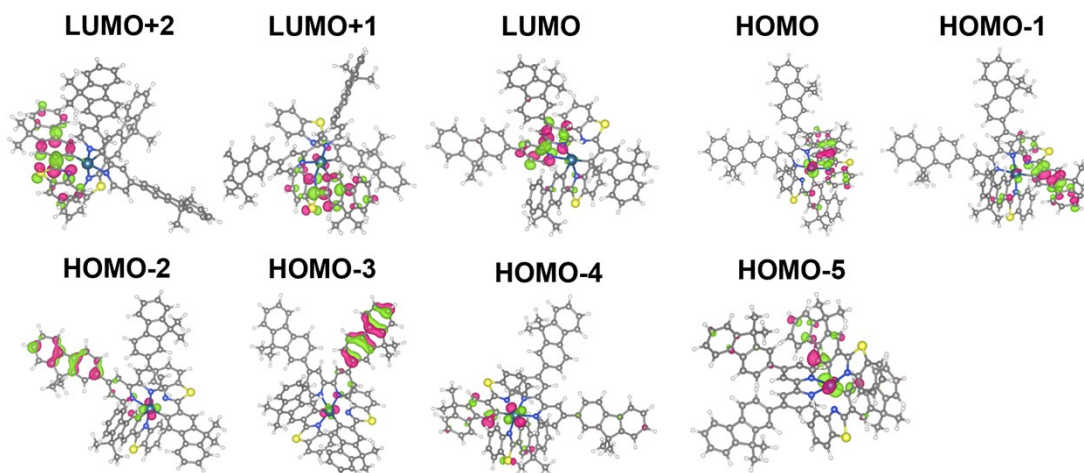

Figure S12. Contour plots of the six HOMOs and three LUMOs for **Ir2**.
